# Supplementary material for: Novel hydroxyl-functionalized ionic liquids as efficient catalysts for the conversion of CO2 into cyclic carbonates under metal/halogen/cocatalyst/solvent-free conditions
Source: Royal Society of Chemistry journal article supplement (doi:10.1039/d2nj00257d), 2022-01-01
Supplement: d2nj00257d1.pdf [file d2nj00257d1.pdf]

# Supporting Information

## Novel hydroxyl functionalized ionic liquids as efficient catalysts for the conversion of CO<sub>2</sub> into cyclic carbonates under metal/halogen/cocatalyst/solvent-free conditions

Shuang Yue <sup>a,\*</sup>, Hongliu Qu<sup>a</sup>, Xinxin Song<sup>a</sup>, Xuannuo Feng<sup>a</sup>

<sup>a</sup> Institute of Rare and Scattered Elements Chemistry, College of Chemistry, Liaoning University, Shenyang, Liaoning 110036, China

### Characteristic data:

#### Ionic liquid 1:

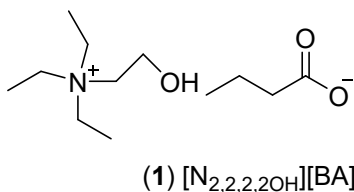

C<sub>12</sub>H<sub>27</sub>NO<sub>3</sub>(233). <sup>1</sup>H NMR (D<sub>2</sub>O, 300MHz, RT): δ=3.91 (2H, s), 3.32 (8H, q), 2.08 (2H, t), 1.47 (2H, m), 1.21 (9H, t), 0.82 (3H, t); <sup>13</sup>C NMR (75.5MHz, D<sub>2</sub>O): δ=184.05, 57.45, 54.81, 53.39, 39.69, 19.46, 13.32, 6.74; IR (KBr): ν=1563 cm<sup>-1</sup> (C=O).

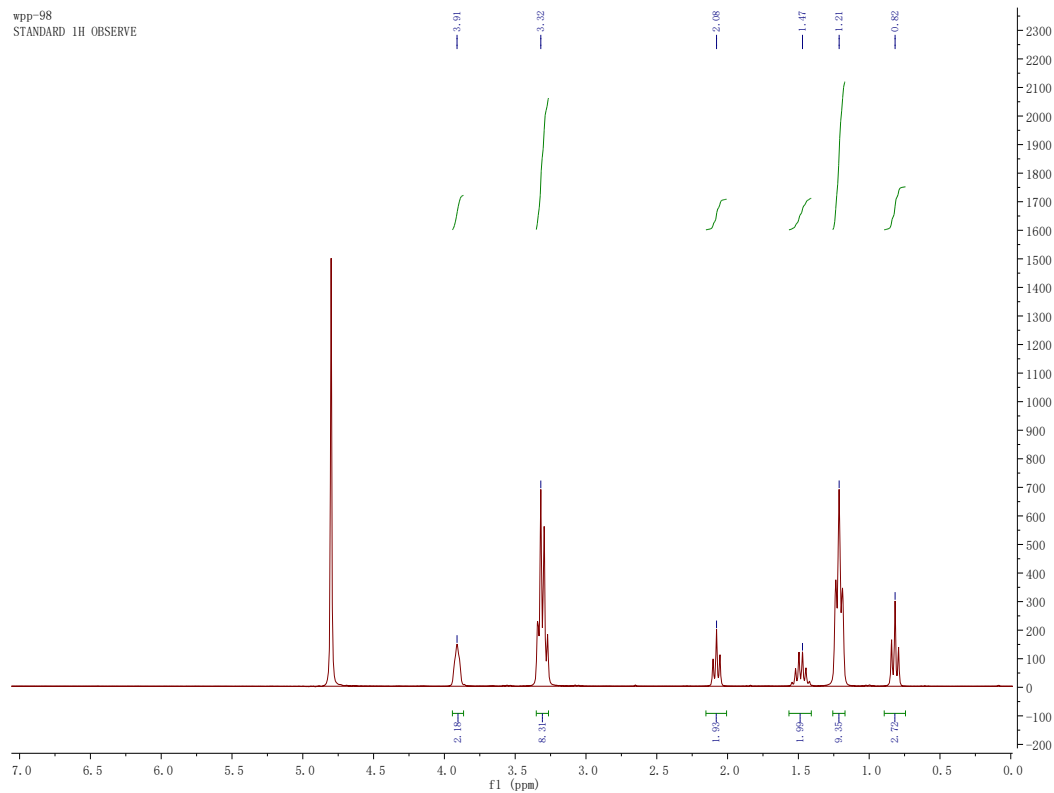

**Figure S1-1. <sup>1</sup>H NMR spectrum of IL1**

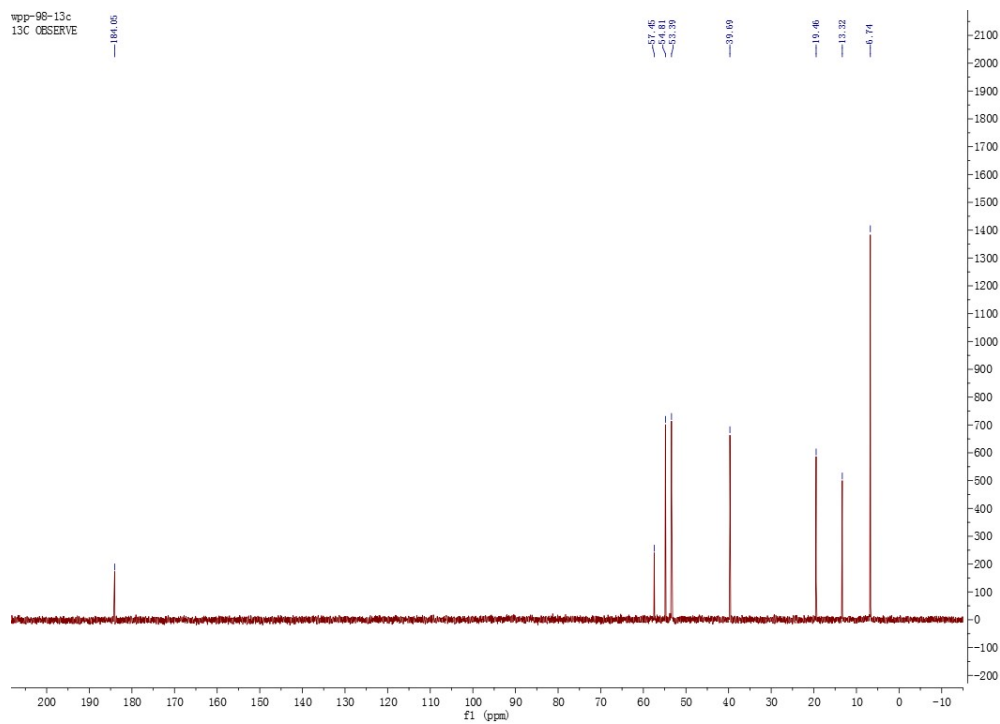

**Figure S1-2. <sup>13</sup>C NMR spectrum of IL1**

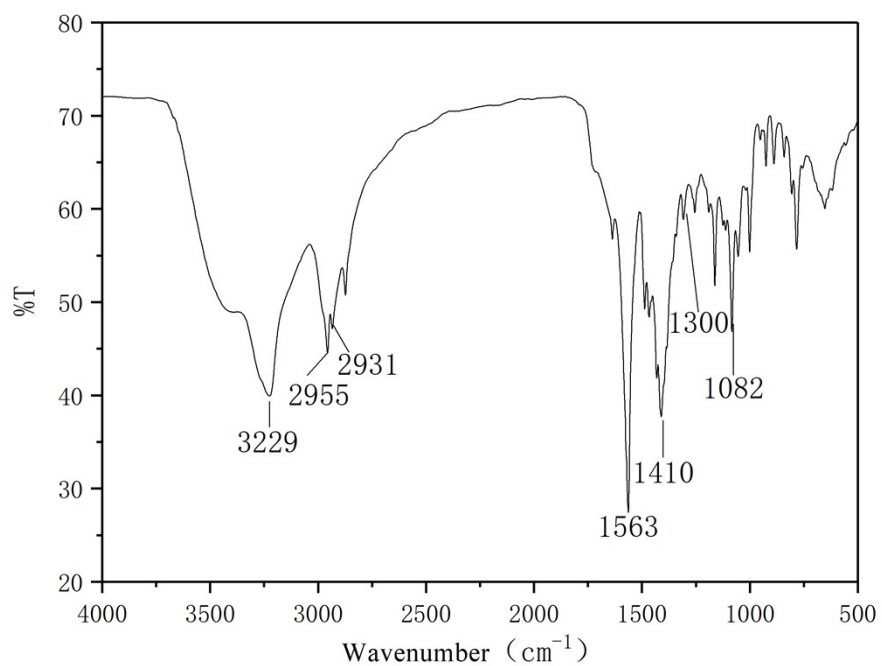

**Figure S1-3.** IR spectrum of IL 1

### Ionic liquid 2

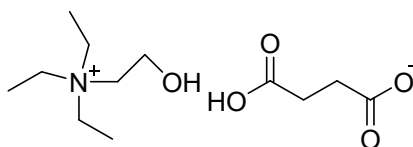

**(2)** [N<sub>2,2,2,2OH</sub>][SA]

C<sub>12</sub>H<sub>25</sub>NO<sub>5</sub>(263). <sup>1</sup>H NMR (D<sub>2</sub>O, 300MHz, RT): δ=3.90 (2H, s), 3.33 (8H, q), 2.44 (4H, t), 1.22 (9H, t); <sup>13</sup>C NMR (75.5MHz, D<sub>2</sub>O): δ=180.08, 57.51, 54.87, 53.47, 32.03, 6.81; IR (KBr): ν=1578 cm<sup>-1</sup> (C=O).

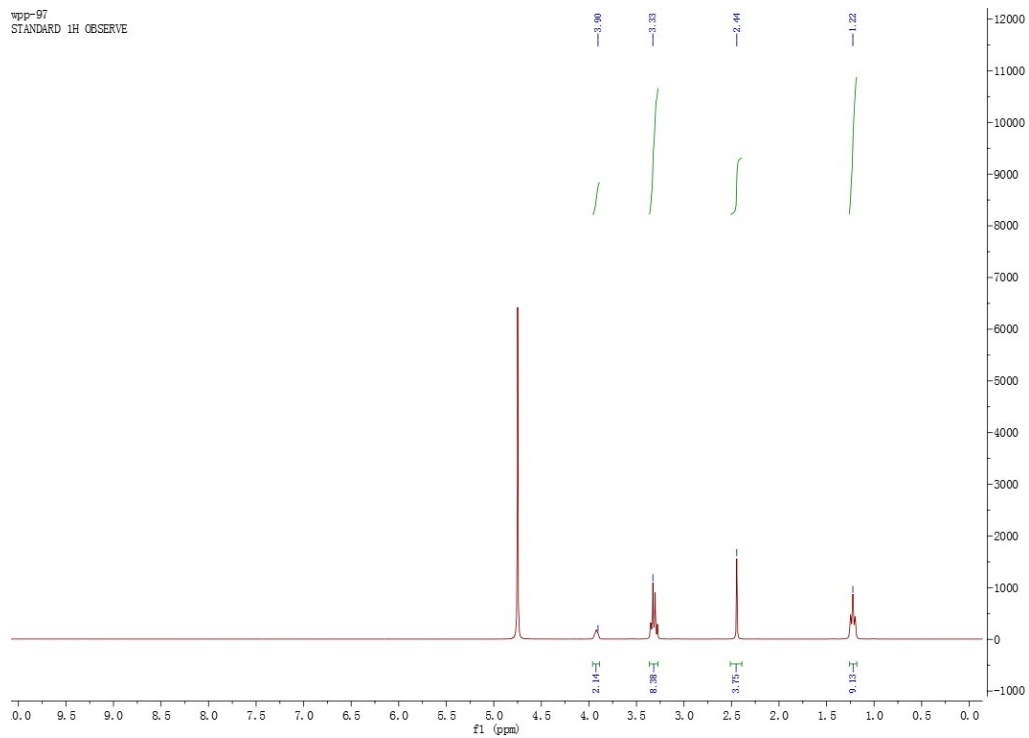

**Figure S2-1.**  $^1\text{H}$  NMR spectrum of IL2

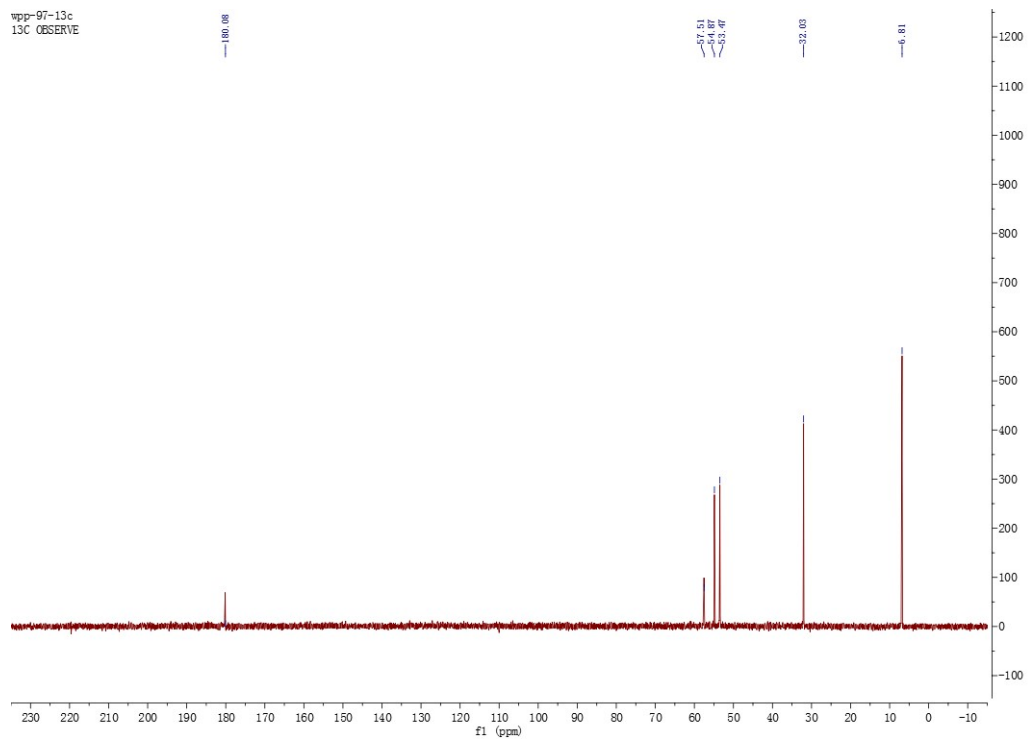

**Figure S2-2.**  $^{13}\text{C}$  NMR spectrum of IL2

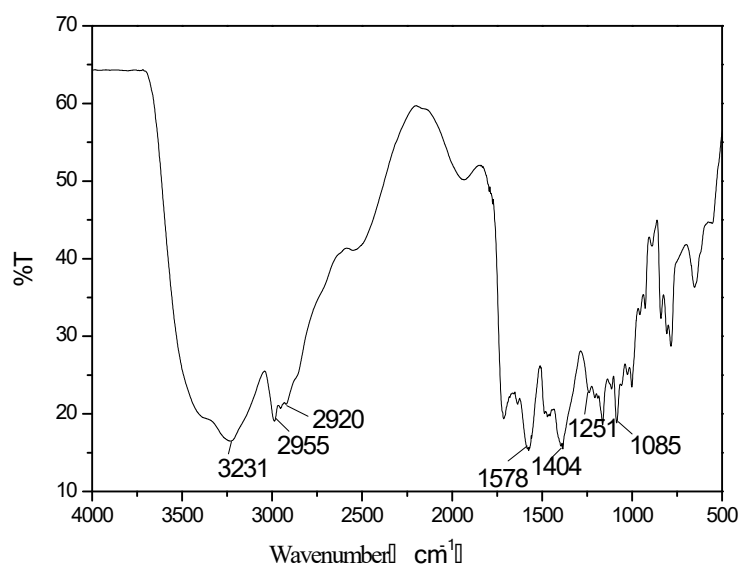

**Figure S2-3.** IR spectrum of IL 2

### Ionic liquid 3

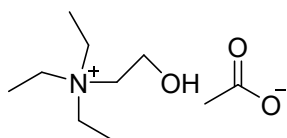

**(3)** [N<sub>2,2,2,2OH</sub>][OAc]

C<sub>10</sub>H<sub>23</sub>NO<sub>3</sub>(205). <sup>1</sup>H NMR (D<sub>2</sub>O, 300MHz, RT): δ=3.90 (2H, s), 3.30 (8H, q), 1.83 (3H, s), 1.20 (9H, t); <sup>13</sup>C NMR (75.5MHz, D<sub>2</sub>O): δ=181.32, 62.62, 57.54, 54.87, 53.47, 23.38, 6.81; IR (KBr): ν=1581 cm<sup>-1</sup> (C=O).

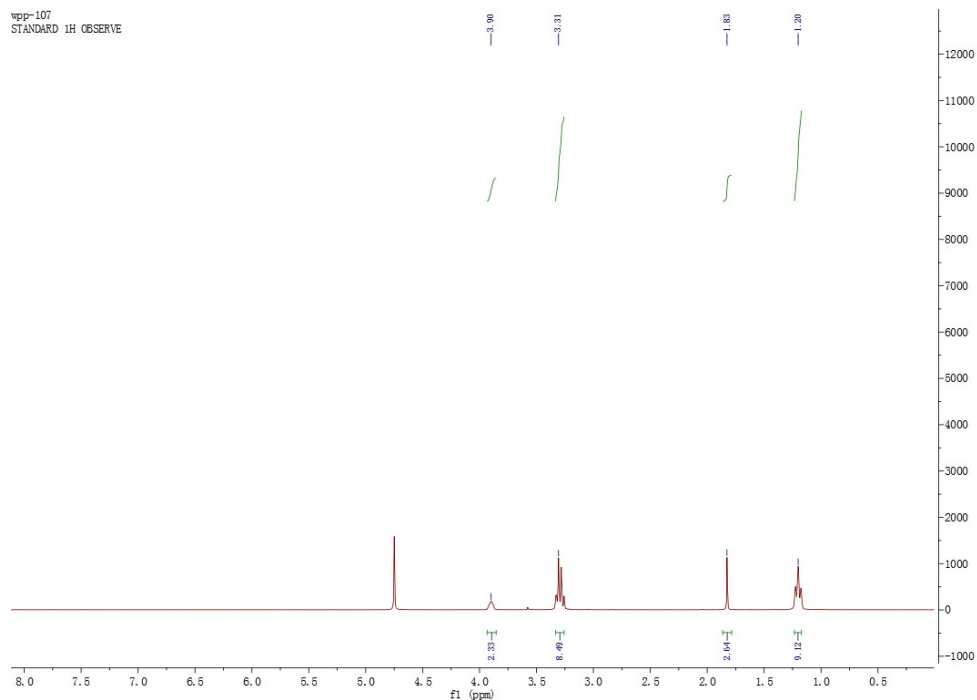

Figure S3-1. <sup>1</sup>H NMR spectrum of IL 3

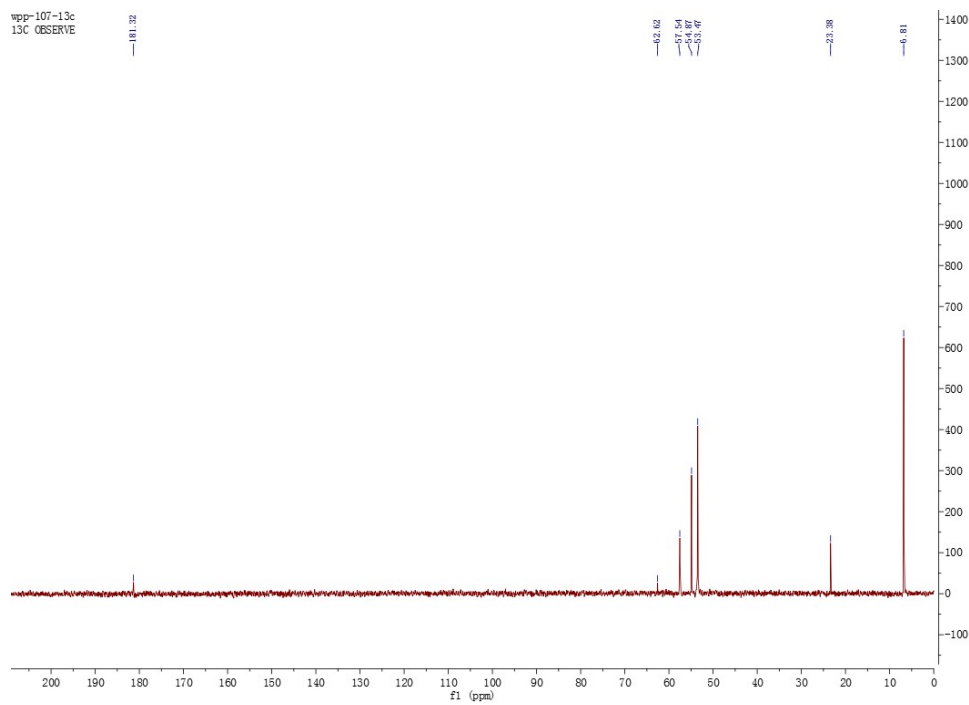

Figure S3-2. <sup>13</sup>C NMR spectrum of IL 3

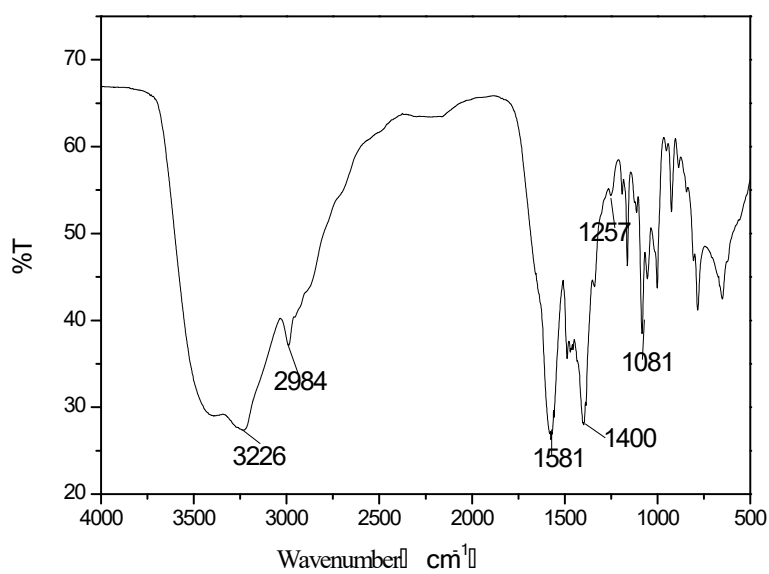

**Figure S3-3.** IR spectrum of IL 3

#### Ionic liquid 4

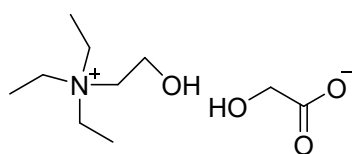

**(4)** [N<sub>2,2,2,2OH</sub>][GA]

C<sub>10</sub>H<sub>23</sub>NO<sub>4</sub>(221). <sup>1</sup>H NMR (D<sub>2</sub>O, 300MHz, RT): δ=3.85 (4H, d), 3.31 (8H, q), 1.21 (9H, t); <sup>13</sup>C NMR (75.5MHz, D<sub>2</sub>O): δ=179.87, 61.30, 57.50, 54.87, 53.45, 6.79; IR (KBr): ν=1600cm<sup>-1</sup> (C=O).

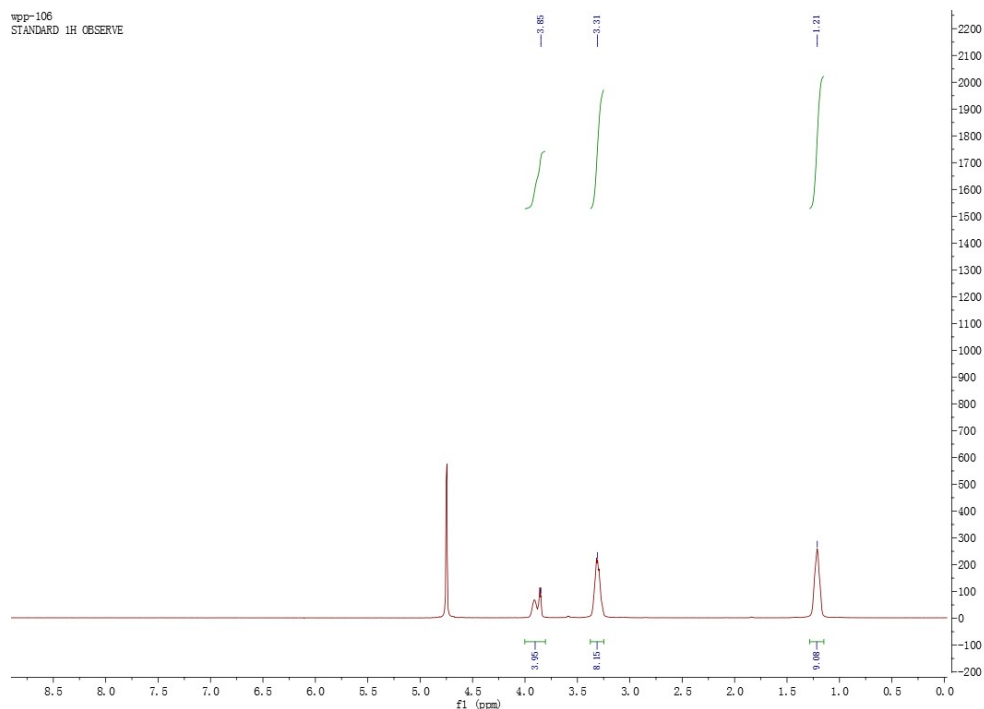

**Figure S4-1.**  $^1\text{H}$  NMR spectrum of IL 4

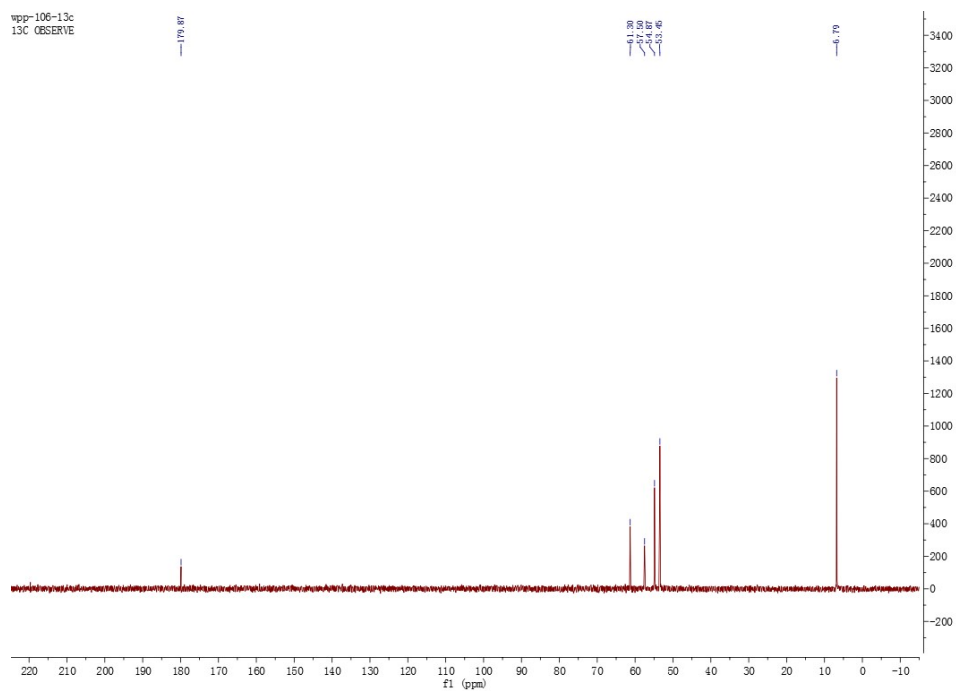

**Figure S4-2.**  $^{13}\text{C}$  NMR spectrum of IL 4



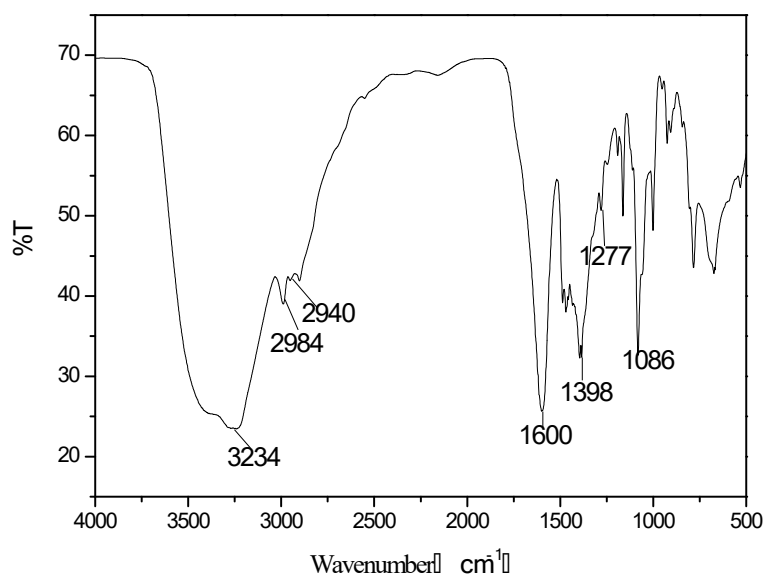

**Figure S4-3.** IR spectrum of IL 4

### Ionic liquid 5

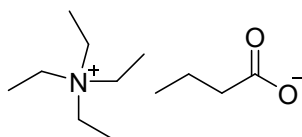

**(5)**  $[N_{2,2,2,2}][BA]$

$C_{12}H_{27}NO_2$  (217).  $^1H$  NMR ( $D_2O$ , 300 MHz, RT):  $\delta$  = 3.17 (8H, q), 2.08 (2H, m), 1.48 (2H, m), 1.18 (12H, m), 0.82 (3H, m);  $^{13}C$  NMR (75 MHz,  $D_2O$ )  $\delta$  = 183.59, 52.07, 39.69, 19.58, 13.55, 6.82; IR (KBr):  $\nu$  = 1564  $cm^{-1}$  (C=O).

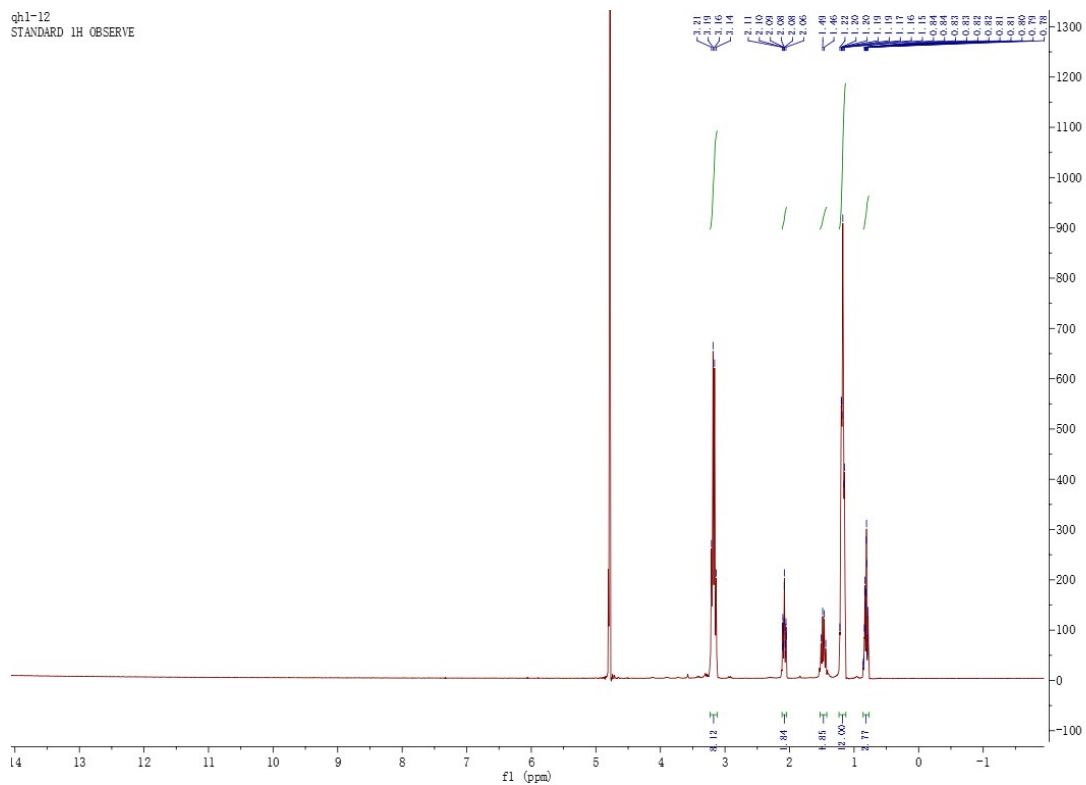

Figure S5-1.  $^1\text{H}$  NMR spectrum of IL 5

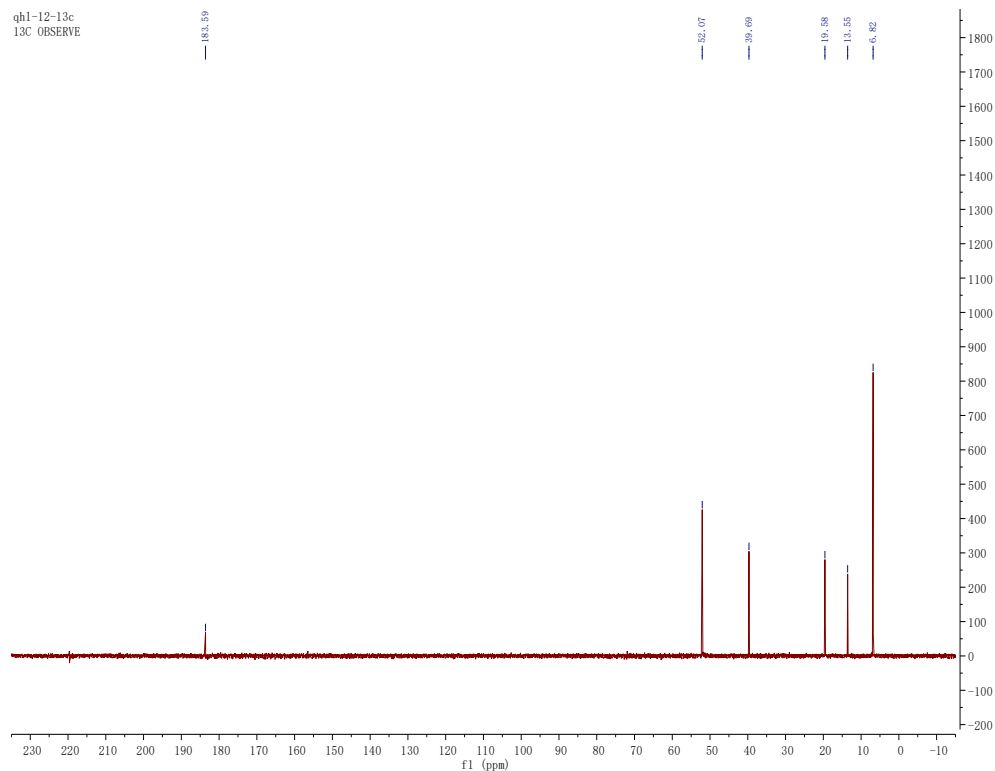

Figure S5-2.  $^{13}\text{C}$  NMR spectrum of IL 5

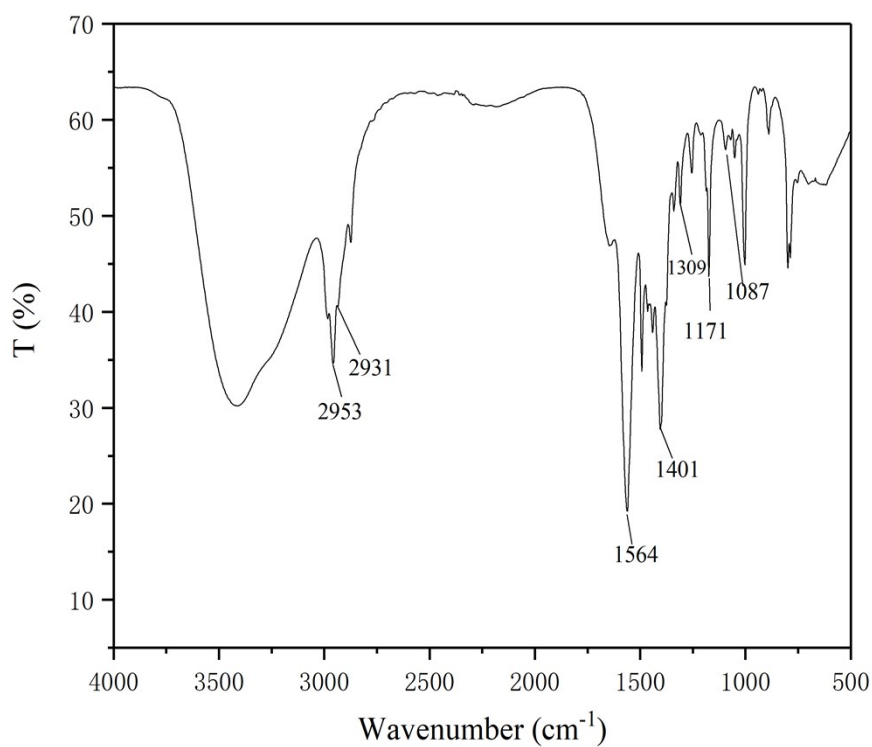

**Figure S5-3.** IR spectrum of IL 5

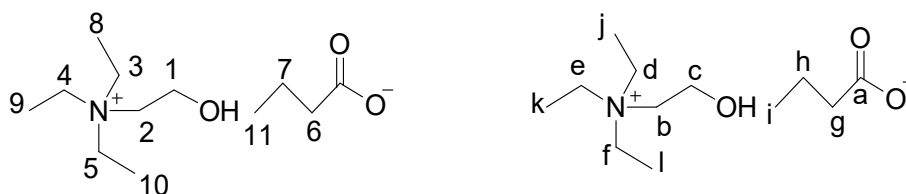

**Figure S6.** Distribution of  $^1\text{H}$  NMR and  $^{13}\text{C}$  NMR spectra of ionic liquid 1.

**Table S1**

$^1\text{H}$  NMR ( $\text{D}_2\text{O}$ ) of IL 1 ( $\delta$ , ppm).

| H(1)   | H(2,3,4,5) | H(6)   | H(7)   | H(8,9,10) | H(11)  |
|--------|------------|--------|--------|-----------|--------|
| 3.91   | 3.32       | 2.08   | 1.47   | 1.21      | 0.82   |
| (2H,s) | (8H,q)     | (2H,t) | (2H,m) | (9H,t)    | (3H,t) |

$^{13}\text{C}$  NMR ( $\text{D}_2\text{O}$ ) of IL 1 ( $\delta$ , ppm).

| $\text{C}^{\text{a}}$ | $\text{C}^{\text{b}}$ | $\text{C}^{\text{c}}$ | $\text{C}^{\text{d}}$ | $\text{C}^{\text{e}}$ | $\text{C}^{\text{f}}$ | $\text{C}^{\text{g}}, \text{C}^{\text{h}}, \text{C}^{\text{i}}$ | $\text{C}^{\text{j}}, \text{C}^{\text{k}}, \text{C}^{\text{l}}$ |
|-----------------------|-----------------------|-----------------------|-----------------------|-----------------------|-----------------------|-----------------------------------------------------------------|-----------------------------------------------------------------|
| 184.05                | 57.45                 | 54.81                 | 53.39                 | 39.69                 | 19.46                 | 13.32                                                           | 6.74                                                            |

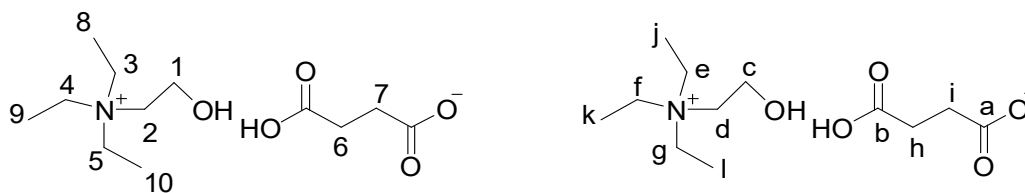

**Figure S7.** Distribution of  $^1\text{H}$  NMR and  $^{13}\text{C}$  NMR spectra of ionic liquid 2.

**Table S2**

$^1\text{H}$  NMR ( $\text{D}_2\text{O}$ ) of IL 2 ( $\delta$ , ppm).

| H(1)   | H(2,3,4,5) | H(6,7) | H(8,9,10) |
|--------|------------|--------|-----------|
| 3.90   | 3.33       | 2.44   | 1.22      |
| (2H,s) | (8H,q)     | (4H,t) | (9H,t)    |

$^{13}\text{C}$  NMR ( $\text{D}_2\text{O}$ ) of IL 2 ( $\delta$ , ppm).

| $\text{C}^{\text{a}}, \text{C}^{\text{b}}$ | $\text{C}^{\text{c}}$ | $\text{C}^{\text{d}}$ | $\text{C}^{\text{e}}, \text{C}^{\text{f}}, \text{C}^{\text{g}}$ | $\text{C}^{\text{h}}, \text{C}^{\text{i}}$ | $\text{C}^{\text{j}}, \text{C}^{\text{k}}, \text{C}^{\text{l}}$ |
|--------------------------------------------|-----------------------|-----------------------|-----------------------------------------------------------------|--------------------------------------------|-----------------------------------------------------------------|
| 180.08                                     | 57.51                 | 54.87                 | 53.47                                                           | 32.03                                      | 6.81                                                            |

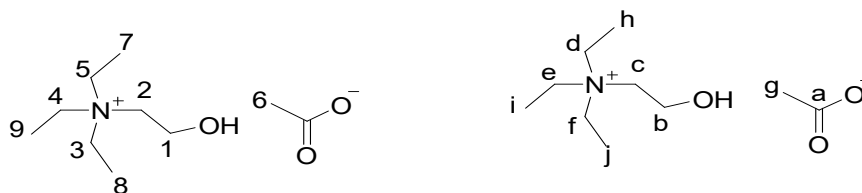

**Figure S8.** Distribution of  $^1\text{H}$  NMR and  $^{13}\text{C}$  NMR spectra of ionic liquid 3.

**Table S3**

$^1\text{H}$  NMR ( $\text{D}_2\text{O}$ ) of IL 3 ( $\delta$ , ppm).

| H(1)   | H(2,3,4,5) | H(6)   | H(7,8,9) |
|--------|------------|--------|----------|
| 3.90   | 3.30       | 1.83   | 1.20     |
| (2H,s) | (8H,q)     | (3H,s) | (9H,t)   |

$^{13}\text{C}$  NMR ( $\text{D}_2\text{O}$ ) of IL 3 ( $\delta$ , ppm).

| $\text{C}^{\text{a}}$ | $\text{C}^{\text{b}}$ | $\text{C}^{\text{c}}$ | $\text{C}^{\text{d}}$ | $\text{C}^{\text{e}}, \text{C}^{\text{f}}$ | $\text{C}^{\text{g}}$ | $\text{C}^{\text{h}}, \text{C}^{\text{i}}, \text{C}^{\text{j}}$ |
|-----------------------|-----------------------|-----------------------|-----------------------|--------------------------------------------|-----------------------|-----------------------------------------------------------------|
| 181.32                | 62.62                 | 57.54                 | 54.87                 | 53.47                                      | 23.38                 | 6.81                                                            |

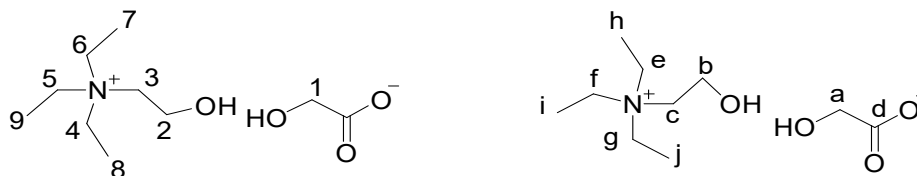

**Figure S9.** Distribution of  $^1\text{H}$  NMR and  $^{13}\text{C}$  NMR spectra of ionic liquid 4.

**Table S4**<sup>1</sup>H NMR (D<sub>2</sub>O) of IL **4** (δ, ppm).

| H(1,2) | H(3,4,5,6) | H(7,8,9) |
|--------|------------|----------|
| 3.85   | 3.31       | 1.21     |
| (4H,d) | (8H,q)     | (9H,t)   |

<sup>13</sup>C NMR (D<sub>2</sub>O) of IL **4** (δ, ppm).

| C <sup>a</sup> | C <sup>b</sup> | C <sup>c</sup> | C <sup>d</sup> | C <sup>e</sup> , C <sup>f</sup> , C <sup>g</sup> | C <sup>h</sup> , C <sup>i</sup> , C <sup>j</sup> |
|----------------|----------------|----------------|----------------|--------------------------------------------------|--------------------------------------------------|
| 179.87         | 61.30          | 57.50          | 54.87          | 53.45                                            | 6.79                                             |

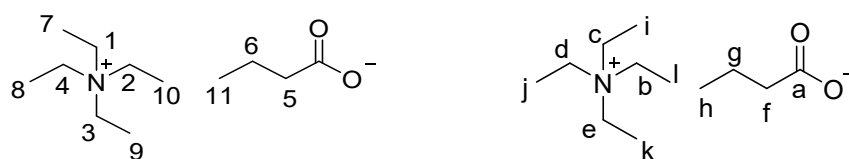**Figure S10.** Distribution of <sup>1</sup>H NMR and <sup>13</sup>C NMR spectra of ionic liquid **5**.**Table S5**<sup>1</sup>H NMR (D<sub>2</sub>O) of IL **5** (δ, ppm).

| H (1,2,3,4) | H(5)   | H(6)   | H(7,8,9,10) | H(11)  |
|-------------|--------|--------|-------------|--------|
| 3.17        | 2.08   | 1.48   | 1.18        | 0.82   |
| (8H,q)      | (2H,m) | (2H,m) | (12H,m)     | (3H,m) |

<sup>13</sup>C NMR (D<sub>2</sub>O) of IL **5** (δ, ppm).

| C <sup>a</sup> | C <sup>b</sup> , C <sup>c</sup> , C <sup>d</sup> , C <sup>e</sup> | C <sup>f</sup> | C <sup>g</sup> | C <sup>h</sup> | C <sup>i</sup> , C <sup>j</sup> , C <sup>k</sup> , C <sup>l</sup> |
|----------------|-------------------------------------------------------------------|----------------|----------------|----------------|-------------------------------------------------------------------|
| 183.59         | 52.07                                                             | 39.69          | 19.58          | 13.55          | 6.82                                                              |

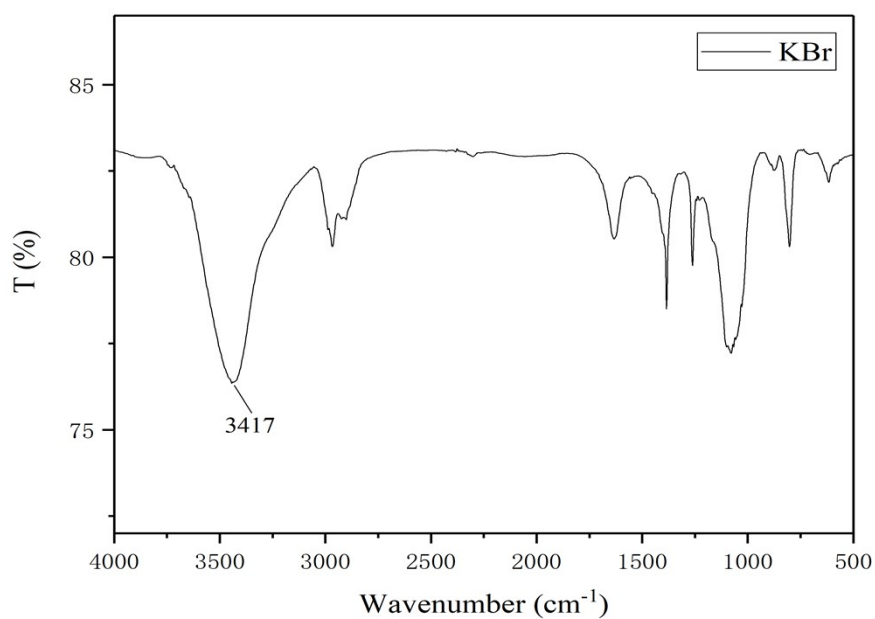**Figure S11.** IR spectrum of IL KBr

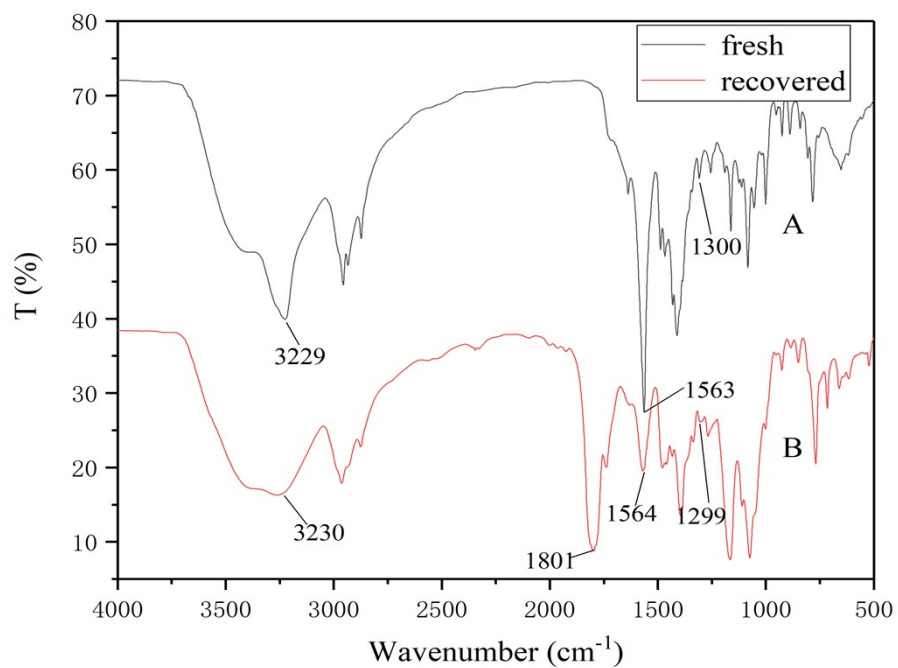

**Figure S12.** FT-IR spectra of catalyst: A: fresh, B: recovered.

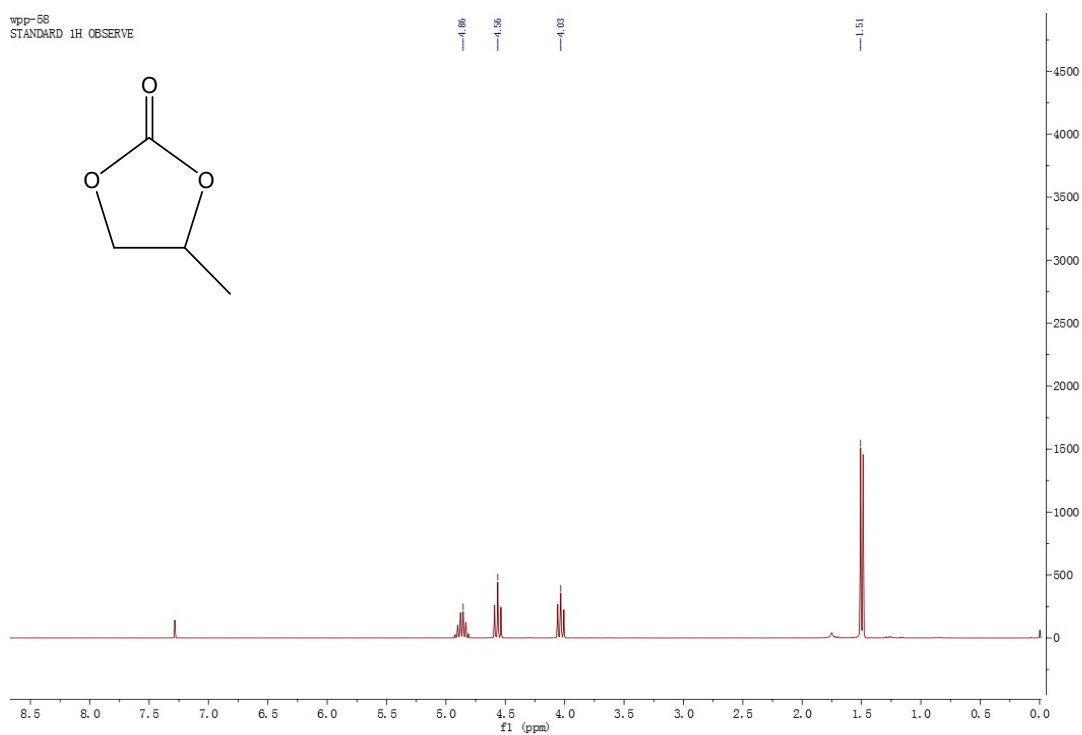

**Figure S13.**  $^1\text{H}$  NMR spectrum of 4-methyl-1,3-dioxolan-2-one

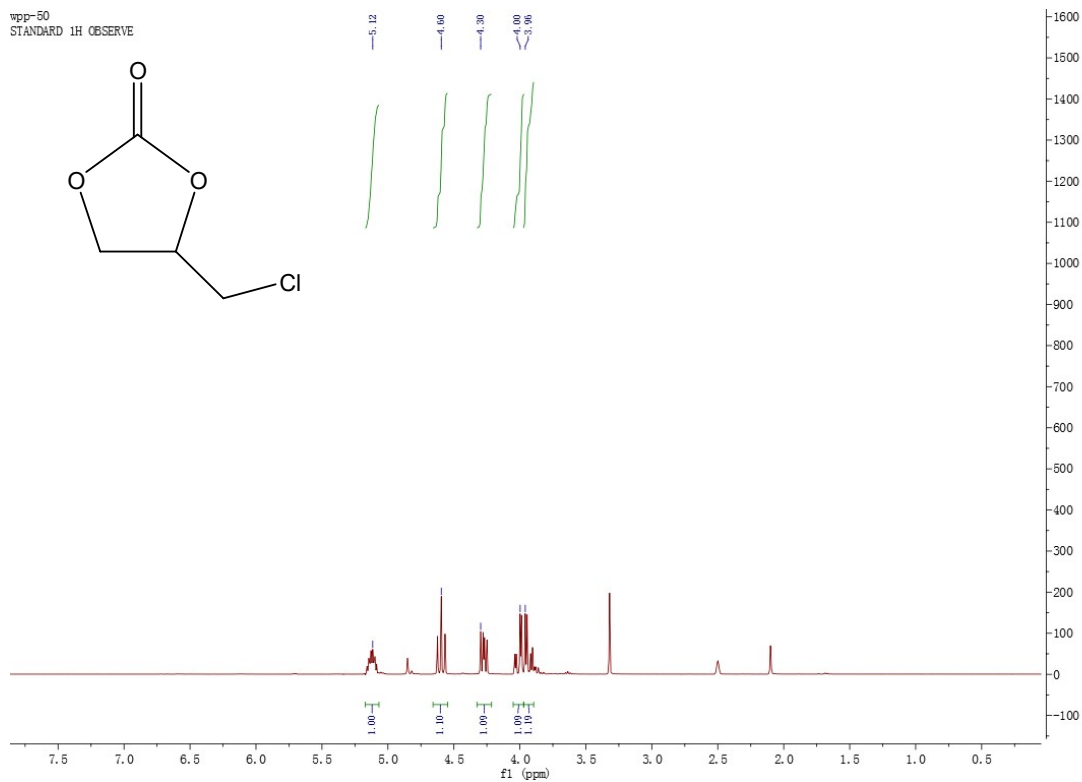

**Figure S14.**  $^1\text{H}$  NMR spectrum of 4-(chloromethyl)-1,3-dioxolan-2-one

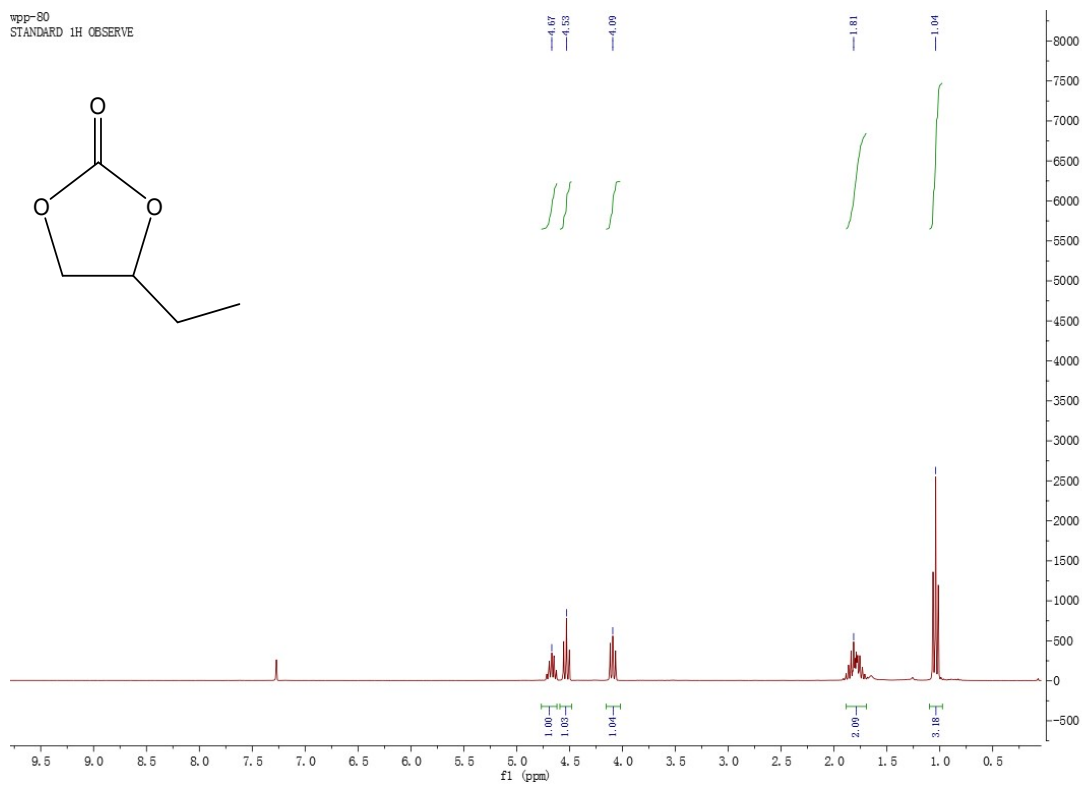

**Figure S15.**  $^1\text{H}$  NMR spectrum of 4-ethyl-1,3-dioxolan-2-one

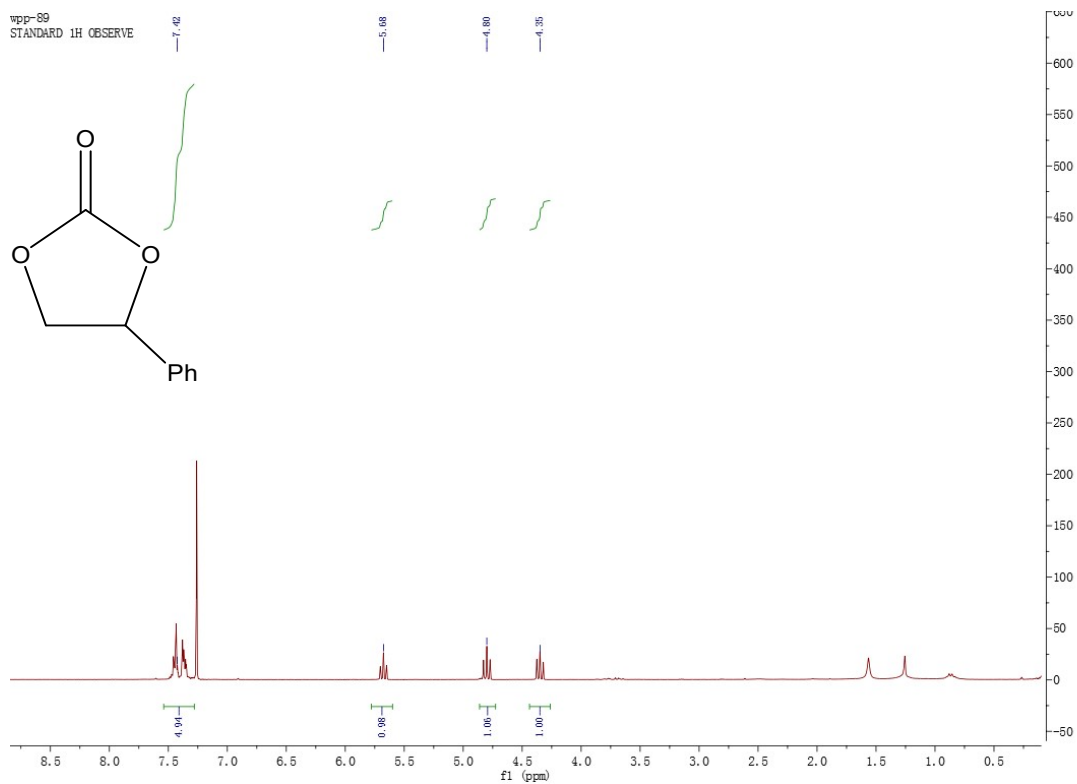

**Figure S16.**  $^1\text{H}$  NMR spectrum of 4-phenyl-1,3-dioxolan-2-one

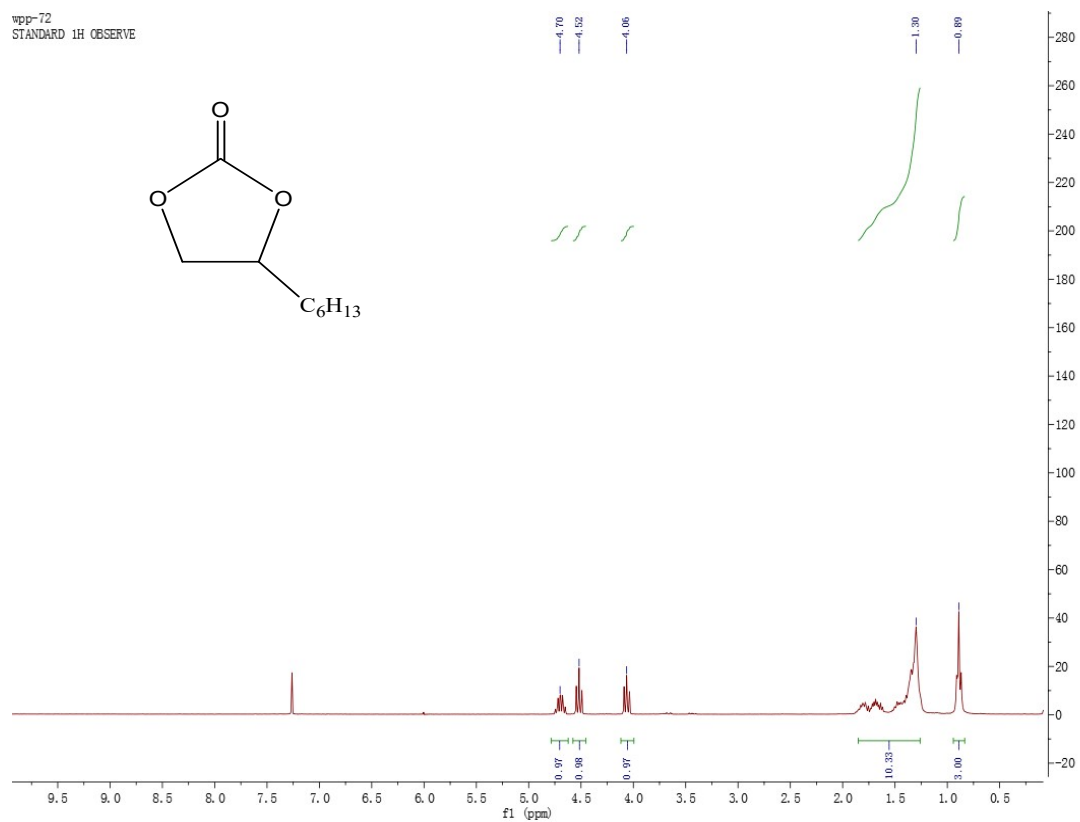

**Figure. S17.**  $^1\text{H}$  NMR spectrum of 4-Hexyl-1,3-dioxolan-2-one



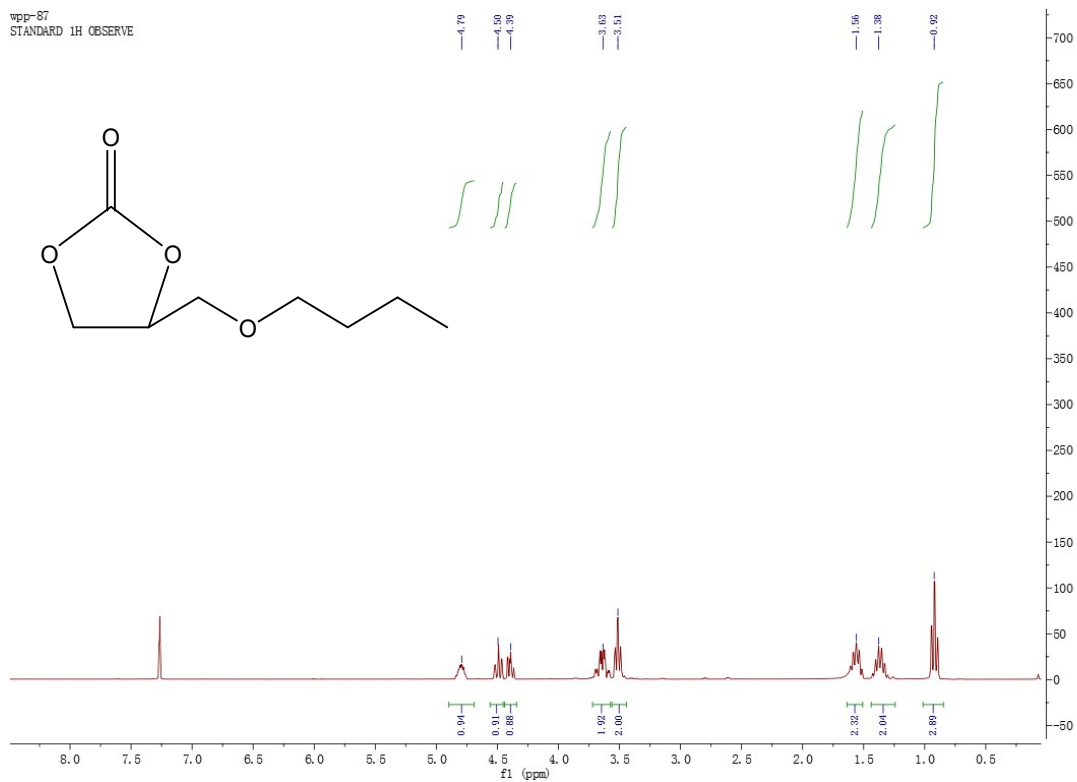

**Figure S18.**  $^1\text{H}$  NMR spectrum of 4-butoxymethyl-1,3-dioxolan-2-one

**Ionic liquid 1:**

$^1\text{H}$  NMR (400 MHz, DMSO)  $\delta$  3.78 (s, 2H), 3.34 (m, 8H), 1.80 (d,  $J = 4.9$  Hz, 2H), 1.40 (m, 2H), 1.17 (m, 9H), 0.80 (t, 3H).

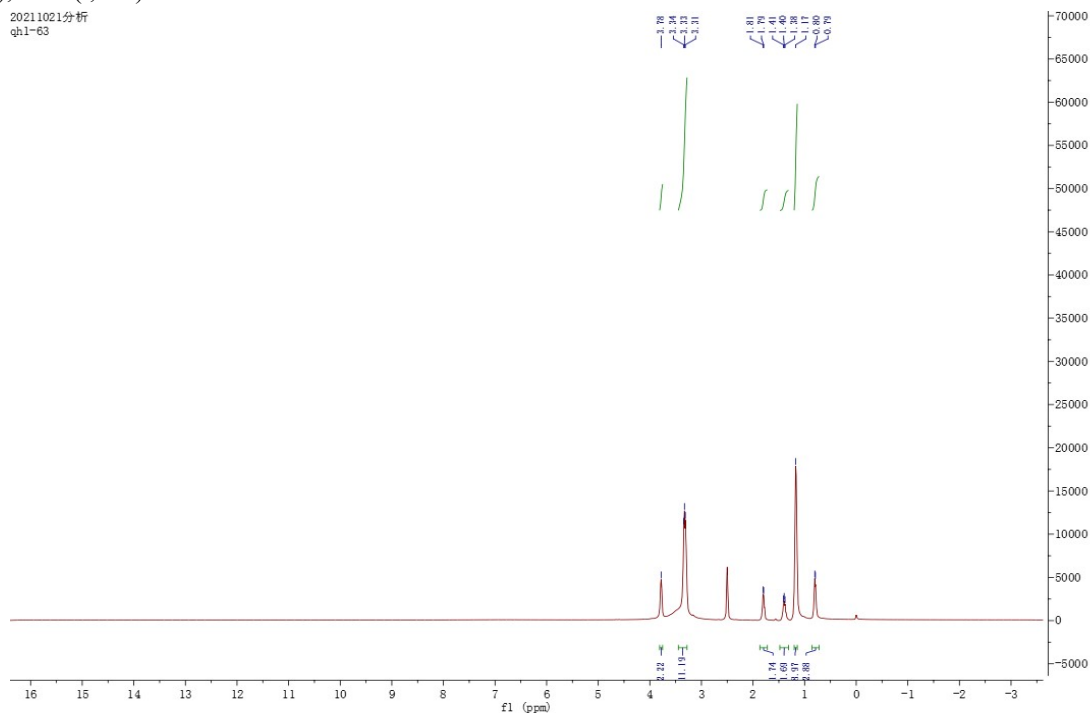

**Figure S19-1.**  $^1\text{H}$  NMR spectrum of IL1 in DMSO

$^1\text{H}$  NMR (400 MHz, DMSO)  $\delta$ 3.79 (s, 3H), 3.34 (m, 8H), 1.80 (t, 2H), 1.40 (m, 2H), 1.17 (d, 9H), 0.80 (t, 3H). epichlorohydrin: 3.90 (m, 1H), 3.54 (m, 1H), 3.24 (m, 1H), 2.85 (m, 1H), 2.78 (m, 1H).

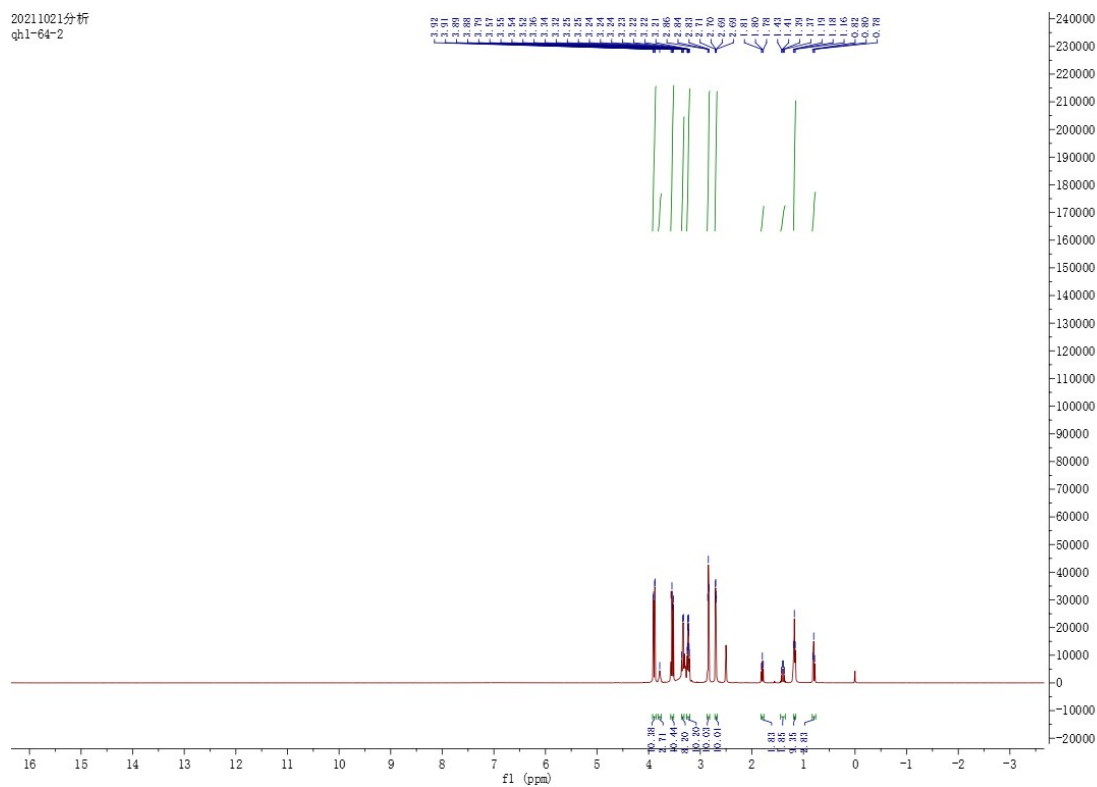

**Figure S19-2**  $^1\text{H}$  NMR spectrum for IL **1** + epichlorohydrin at 25 °C and  $t = 0.5$  h in DMSO

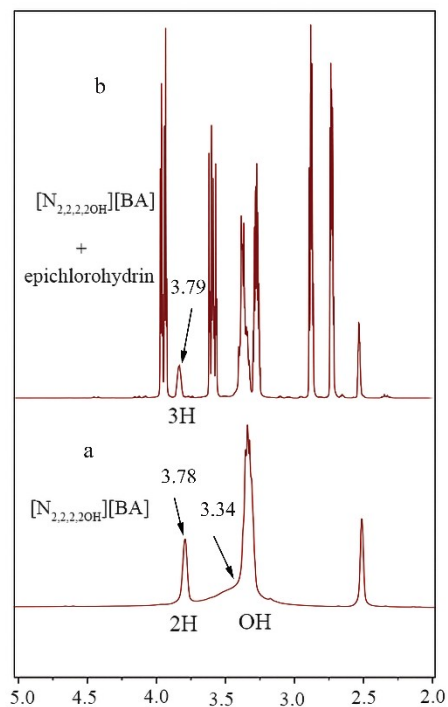

**Figure S19-3.** (a)  $^1\text{H}$ -NMR spectrum for  $[\text{N}_{2,2,2,2\text{OH}}][\text{BA}]$  in DMSO. (b)  $^1\text{H}$ -NMR spectrum for

$[\text{N}_{2,2,2,2\text{OH}}][\text{BA}]$  + epichlorohydrin at 25 °C and  $t = 0.5$  h in DMSO.
